# Supplementary material
Source: PubMed Central journal article supplement (PMC6436947)
Supplement: NIHMS1015084-supplement-Supporting_Information.pdf [file NIHMS1015084-supplement-Supporting_Information.pdf]

**Supporting Information**  
**Visualization and Identification of Neurotransmitters in**  
**Crustacean Brain via Multifaceted Mass Spectrometric**  
**Approaches**

**Qinjingwen Cao<sup>1</sup>, Yijia Wang<sup>2</sup>, Bingming Chen<sup>3</sup>, Fengfei Ma<sup>3</sup>, Ling Hao<sup>3</sup>, Gongyu Li<sup>3</sup>,**  
**Chuanzi Ouyang<sup>1</sup>, Lingjun Li<sup>1,3\*</sup>**

*<sup>1</sup>Department of Chemistry, University of Wisconsin-Madison, 1101 University Avenue, Madison, Wisconsin, 53706, United States*

*<sup>2</sup>Department of Chemical Physics, School of Chemistry and Materials Science, University of Science and Technology of China, 96 Jinzhai Road, Hefei, Anhui, 230026, China*

*<sup>3</sup>School of Pharmacy, University of Wisconsin-Madison, 777 Highland Avenue, Madison, Wisconsin, 53705, United States*

**\*Corresponding author**

Tel.: (608) 265-8491

Fax: (608) 262-5345

E-mail: lingjun.li@wisc.edu

**Table S1.** Neurotransmitters and metabolites identified from crab brain tissue via HRAM MALDI-LTQ-Orbitrap XL platform

(a) Comparison of theoretical and detected  $m/z$  values in derivatized crab brain tissue

| Compound                           | Theoretical<br>$m/z$ | Detected<br>$m/z$ | Error<br>(ppm) |
|------------------------------------|----------------------|-------------------|----------------|
| Glycine+DPP <sup>+</sup>           | 290.1176             | 290.1175          | -0.2           |
| Alanine+DPP <sup>+</sup>           | 304.1332             | 304.1332          | -0.1           |
| GABA+DPP <sup>+</sup>              | 318.1489             | 318.1488          | -0.2           |
| Histamine+DPP <sup>+</sup>         | 326.1652             | 326.1650          | -0.6           |
| Proline+DPP <sup>+</sup>           | 330.1489             | 330.1489          | 0.2            |
| Threonine+DPP <sup>+</sup>         | 334.1438             | 334.1435          | -0.9           |
| Phenethylamine+DPP <sup>+</sup>    | 336.1747             | 336.1745          | -0.6           |
| Taurine+DPP <sup>+</sup>           | 340.1002             | 340.0999          | -0.9           |
| 3-Methylhistamine+DPP <sup>+</sup> | 340.1808             | 340.1806          | -0.7           |
| Agmatine+DPP <sup>+</sup>          | 345.2074             | 345.2073          | -0.3           |
| Adenine+DPP <sup>+</sup>           | 350.1400             | 350.1400          | -0.1           |
| Tyramine+DPP <sup>+</sup>          | 352.1696             | 352.1695          | -0.3           |
| Lysine+DPP <sup>+</sup>            | 361.1911             | 361.1908          | -0.8           |
| Dopamine+DPP <sup>+</sup>          | 368.1645             | 368.1642          | -0.9           |
| Tryptamine+DPP <sup>+</sup>        | 375.1856             | 375.1851          | -1.3           |
| Phenylalanine+DPP <sup>+</sup>     | 380.1645             | 380.1641          | -1.1           |
| Serotonin+DPP <sup>+</sup>         | 391.1805             | 391.1811          | 1.6            |
| Dopa+DPP <sup>+</sup>              | 412.1543             | 412.1538          | -1.3           |
| Biopterin+DPP <sup>+</sup>         | 452.1717             | 452.1719          | 0.5            |
| Adenosine+DPP <sup>+</sup>         | 482.1823             | 482.1820          | -0.6           |

(b) Comparison of theoretical and detected  $m/z$  values in non-derivatized crab brain tissue

| Compound                                 | Theoretical<br>$m/z$ | Detected<br>$m/z$ | Error<br>(ppm) |
|------------------------------------------|----------------------|-------------------|----------------|
| Choline                                  | 104.1070             | 104.1068          | -1.8           |
| Acetylcholine                            | 146.1176             | 146.1175          | -0.4           |
| Carnitine+H <sup>+</sup>                 | 162.1125             | 162.1124          | -0.5           |
| Arginine+H <sup>+</sup>                  | 175.1190             | 175.1191          | 0.9            |
| Phosphocholine                           | 184.0733             | 184.0734          | 0.6            |
| N6,N6,N6-Trimethyl-lysine+H <sup>+</sup> | 189.1598             | 189.1596          | -0.9           |
| Arginine+Na <sup>+</sup>                 | 197.1009             | 197.1010          | 0.6            |
| Acetyl-carnitine+H <sup>+</sup>          | 204.1230             | 204.1230          | -0.2           |

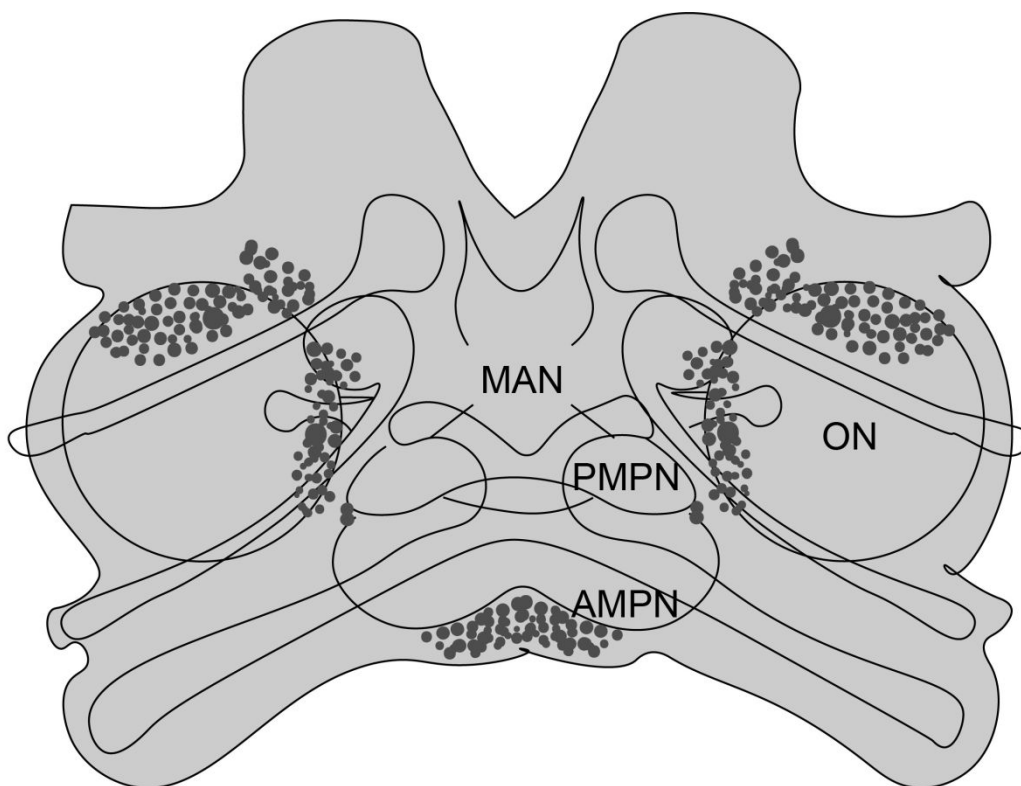

**Figure S1.** Illustration of a crab brain from the dorsal view. Main structures are revealed, including olfactory lobes (ON), median antenna I neuropil (MAN), anterior medial protocerebral neuropil (AMPN) and posterior medial protocerebral neuropil (PMPN).

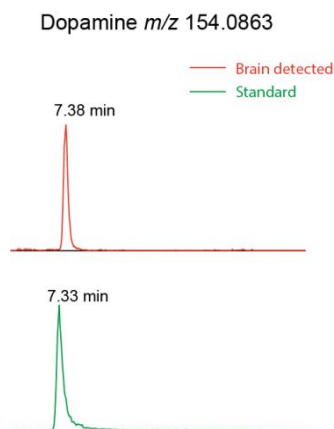

**Figure S2.** Identification of dopamine by matching ion  $m/z$  154.0863 retention time with dopamine standard. Top panel: extracted ion chromatogram (EIC) of dopamine ( $m/z$  154.0863) from crab brain extract; bottom panel: EIC of dopamine ( $m/z$  154.0863) from purchased standard compound.

## **References:**

Sandeman, David, et al. "Morphology of the brain of crayfish, crabs, and spiny lobsters: a common nomenclature for homologous structures." *The Biological Bulletin* 183.2 (1992): 304-326.
